# Supplementary material
Source: publisher figshare collection journal article supplement (https://acs.figshare.com/ndownloader/files/5186458)
Supplement: Supplementary file 1 [file 5186458]

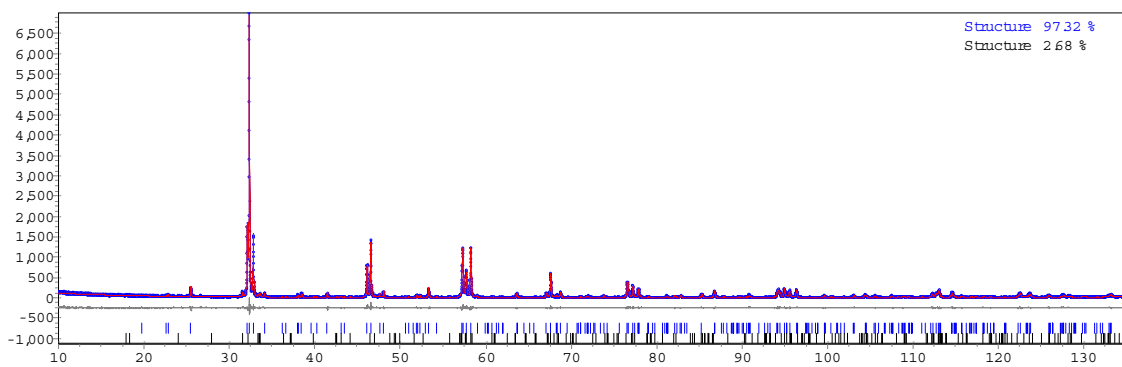

(a)

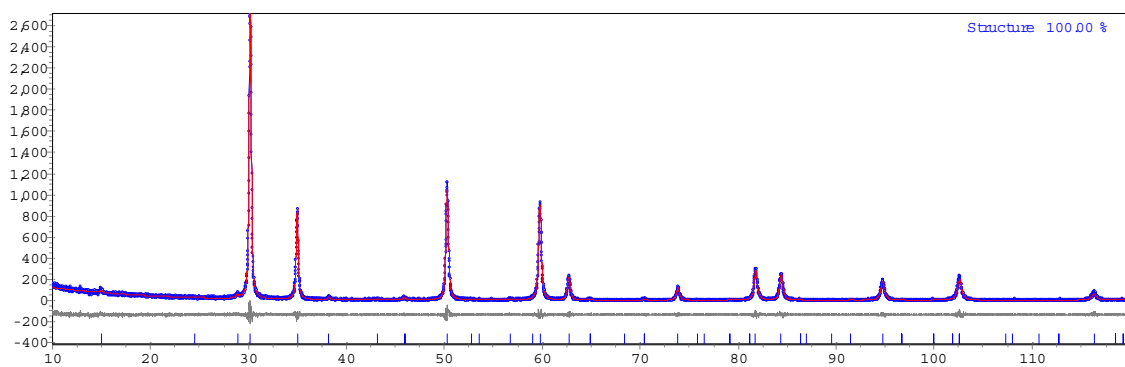

(b)

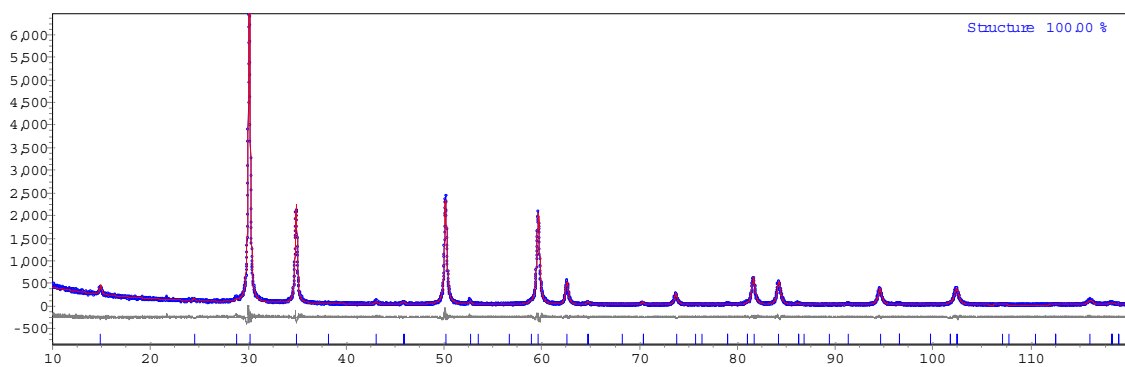

(c)

Figure S1. Results of Rietveld refinement of the structure of (a)  $\text{CdSnO}_3$ , (b)  $\text{Cd}_2\text{Sb}_2\text{O}_7$ , and (c)  $\text{Ag}_2\text{Sb}_2\text{O}_6$ . The observed and calculated patterns are indicated by the blue dotted and red solid lines, respectively. The difference curve is shown at the bottom on the same scale. The tick marks indicate the positions of reflections from the oxides contained into the calculation.
